# Supplementary material for: Calibrating Antarctic ice sheet mass loss due to millennial-scale ocean thermal forcing
Source: Research Square preprint supplement (doi:10.21203/rs.3.rs-820445/v1), 2021-08-24
Supplement: Supplementary file 1 [file 9cd0657514b340aa8e10f8b0.xlsx]

## Sheet: Sheet1
Sample Name	mineralogy	Th (ppm)	U (ppm)	232Th/238U	2σ unc	(230Th/232Th)	2σ unc	(234U/238U)	2σ unc	U-Th age (ka)	2σ unc	(234/238)i	2σ unc
MA113c_1A	calcite	0.0176034	0.307515	0.0587221	0.000208591	47.9207	0.33539	2.19134	0.0119824	54.368	0.522142	2.38888	0.0264005
MA113_Op5	opal	0.0185825	0.423586	0.0450022	0.000395693	58.2547	3.23828	2.25869	0.0111646	48.004	0.992159	2.44129	0.0518802
MA113_Op6	opal	0.0169099	0.230956	0.0751074	0.000295915	33.3094	0.997828	2.24658	0.0124702	44.678	1.54563	2.41812	0.0829027
MA113c_6B	calcite	0.0582027	0.469667	0.127123	0.000437586	19.1591	0.217229	2.25639	0.00357291	43.31	0.670995	2.42256	0.037129
MA113_Op7	opal	0.0293305	0.215398	0.139684	0.000382731	16.4023	0.667462	2.19019	0.0164433	42.453	1.77462	2.34167	0.0994526
PRR50489_OpA	opal	0.433575	14.1984	0.0313252	5.08721e-05	182.752	0.779536	1.85048	0.00232031	229.554	1.42494	2.62555	0.016627
PRR50489_OpB	opal	1.28589	11.9899	0.110017	0.000161134	55.145	0.176066	1.98947	0.00311472	216.225	1.02849	2.8214	0.0141285
PRR50489_OpBBC1	opal	0.241858	2.94355	0.0842867	0.000173981	73.2572	1.53967	2.06002	0.0017328	205.439	3.26204	2.89277	0.045997
PRR50489_OpBBC2	opal	0.251964	6.93596	0.0372651	3.90377e-05	163.998	0.590038	2.07429	0.00155762	197.067	0.778537	2.87344	0.0115551
PRR50489_OpBC	opal	0.72665	15.2024	0.0490325	0.000896968	128.515	0.00660819	2.13708	0.019004	196.111	4.46941	2.9776	0.072843
PRR50489_C	opal	0.485099	6.6363	0.0749851	0.000367992	81.9448	0.63439	2.1038	0.00330856	192.628	1.5042	2.90096	0.023108
PRR50489_OpCD	opal	0.462294	1.58387	0.299412	0.001122	20.3424	0.424817	2.13926	0.0158398	181.609	4.46207	2.90195	0.0744671
PRR50489_OpD	opal	0.412629	11.5654	0.0365991	2.87771e-05	176.415	0.518102	2.34414	0.0324193	167.083	3.32746	3.15387	0.076469
PRR50489_E	opal	0.160514	35.6828	0.0046145	3.24768e-06	1326.04	4.21832	2.29508	0.00208575	157.413	0.725589	3.01938	0.0141856
PRR50489_F	opal	0.640983	14.3327	0.0458764	7.79636e-05	131.756	0.829018	2.27201	0.00143762	157.003	0.948118	2.98112	0.0181011
PRR50489_G	opal	0.0534408	15.6198	0.00350969	1.04841e-05	1638.63	5.61646	2.23329	0.00174863	148.155	0.844824	2.87345	0.016539
