# Supplementary material for: Calibrating Antarctic ice sheet mass loss due to millennial-scale ocean thermal forcing
Source: Research Square preprint supplement (doi:10.21203/rs.3.rs-820445/v1), 2021-08-24
Supplement: Supplementary file 2 [file b59be948fcf6327a43532ad7.xlsx]

## Sheet: Sheet1
sample + aliquot	δ18O (VSMOW)	δ18O (‰ SMOW, WATER @ T based on mixing ratio)
MA-113 DI.1	-16.4896	-59.8225
MA-113 DI.2	-9.25359	-52.7942
MA-113 DI.4	-14.1489	-57.9281
PRR 50489-A	-8.47612	-52.1131
PRR 50489-B	-11.0022	-54.6066
PRR 50489-BBC	-5.96108	-49.7949
PRR 50489-C	-5.44878	-49.3484
PRR 50489-E	-3.03692	-46.9853
PRR 50489-F	-5.07419	-48.8322
PRR 50489-F	-5.3631	-49.2089
PRR 50489-G	-4.11607	-48.0384
Standards	Standard type	Mineral	δ18O (VSMOW)	δ18O SE	N
BX-88	Secondary	Quartz	9.746	0.216473	23
L1/UNM_Q	Primary	Quartz	18.2598	0.126139	30
NBS-28	Primary	Quartz	10.1435	0.182644	25
PS1772-8	Secondary	Opal A	41.4933	0.569582	8
SCO	Primary	Olivine	5.33405	0.135101	20
UCD-DFS	Secondary	opal CT	29.7795	0.280432	18
UWG-2	Primary	Garnet	6.03193	0.126857	22
